# Supplementary material for: Micro-CT Features of Lung Consolidation, Collagen Deposition and Inflammation in Experimental RSV Infection Are Aggravated in the Absence of Nrf2
Source: MDPI journal article supplement (doi:10.3390/v15051191), 2023-05-18
Supplement: s1 [file s1]

**Supplementary Table S1.** List of inflammatory cytokines and receptors mouse genes (total 90 genes).

| Gene Symbol | Gene name                                            |
|-------------|------------------------------------------------------|
| Actb        | Actin, beta                                          |
| Aimp1       | Aminoacyl tRNA synthetase complex-interacting        |
| B2m         | Beta-2 microglobulin                                 |
| Bmp2        | Bone morphogenetic protein 2                         |
| Ccl1        | Chemokine (C-C motif) ligand 1                       |
| Ccl11       | Chemokine (C-C motif) ligand 11                      |
| Ccl12       | Chemokine (C-C motif) ligand 12                      |
| Ccl17       | Chemokine (C-C motif) ligand 17                      |
| Ccl19       | Chemokine (C-C motif) ligand 19                      |
| Ccl2        | Chemokine (C-C motif) ligand 2                       |
| Ccl20       | Chemokine (C-C motif) ligand 20                      |
| Ccl22       | Chemokine (C-C motif) ligand 22                      |
| Ccl24       | Chemokine (C-C motif) ligand 24                      |
| Ccl3        | Chemokine (C-C motif) ligand 3                       |
| Ccl4        | Chemokine (C-C motif) ligand 4                       |
| Ccl5        | Chemokine (C-C motif) ligand 5                       |
| Ccl6        | Chemokine (C-C motif) ligand 6                       |
| Ccl7        | Chemokine (C-C motif) ligand 7                       |
| Ccl8        | Chemokine (C-C motif) ligand 8                       |
| Ccl9        | Chemokine (C-C motif) ligand 9                       |
| Ccr1        | Chemokine (C-C motif) receptor 1                     |
| Ccr10       | Chemokine (C-C motif) receptor 10                    |
| Ccr2        | Chemokine (C-C motif) receptor 2                     |
| Ccr3        | Chemokine (C-C motif) receptor 3                     |
| Ccr4        | Chemokine (C-C motif) receptor 4                     |
| Ccr5        | Chemokine (C-C motif) receptor 5                     |
| Ccr6        | Chemokine (C-C motif) receptor 6                     |
| Ccr8        | Chemokine (C-C motif) receptor 8                     |
| Cd40lg      | CD40 ligand                                          |
| Csf1        | Colony stimulating factor 1 (macrophage)             |
| Csf2        | Colony stimulating factor 2 (granulocyte macrophage) |
| Csf3        | Colony stimulating factor 3 (granulocyte)            |
| Cx3cl1      | Chemokine (C-X3-C motif) ligand 1                    |
| Cxcl1       | Chemokine (C-X-C motif) ligand 1                     |
| Cxcl10      | Chemokine (C-X-C motif) ligand 10                    |
| Cxcl12      | Chemokine (C-X-C motif) ligand 12                    |
| Cxcl13      | Chemokine (C-X-C motif) ligand 13                    |
| Cxcl15      | Chemokine (C-X-C motif) ligand 15                    |
| Cxcl5       | Chemokine (C-X-C motif) ligand 5                     |
| Cxcl9       | Chemokine (C-X-C motif) ligand 9                     |

|          |                                                           |
|----------|-----------------------------------------------------------|
| Cxcr2    | Chemokine (C-X-C motif) receptor 2                        |
| Cxcr3    | Chemokine (C-X-C motif) receptor 3                        |
| Cxcr5    | Chemokine (C-X-C motif) receptor 5                        |
| Fasl     | Fas ligand (TNF superfamily, member 6)                    |
| Gapdh    | Glyceraldehyde-3-phosphate dehydrogenase                  |
| Gusb     | Glucuronidase, beta                                       |
| Hprt     | Hypoxanthine guanine phosphoribosyl transferase           |
| Hsp90ab1 | Heat shock protein 90 alpha (cytosolic), class B member 1 |
| Ifng     | Interferon gamma                                          |
| Il10ra   | Interleukin 10 receptor, alpha                            |
| Il10rb   | Interleukin 10 receptor, beta                             |
| Il11     | Interleukin 11                                            |
| Il13     | Interleukin 13                                            |
| Il15     | Interleukin 15                                            |
| Il16     | Interleukin 16                                            |
| Il17a    | Interleukin 17A                                           |
| Il17b    | Interleukin 17B                                           |
| Il17f    | Interleukin 17F                                           |
| Il1a     | Interleukin 1 alpha                                       |
| Il1b     | Interleukin 1 beta                                        |
| Il1r1    | Interleukin 1 receptor, type I                            |
| Il1rn    | Interleukin 1 receptor antagonist                         |
| Il21     | Interleukin 21                                            |
| Il27     | Interleukin 27                                            |
| Il2rb    | Interleukin 2 receptor, beta chain                        |
| Il2rg    | Interleukin 2 receptor, gamma chain                       |
| Il3      | Interleukin 3                                             |
| Il33     | Interleukin 33                                            |
| Il4      | Interleukin 4                                             |
| Il5      | Interleukin 5                                             |
| Il5ra    | Interleukin 5 receptor, alpha                             |
| Il6ra    | Interleukin 6 receptor, alpha                             |
| Il6st    | Interleukin 6 signal transducer                           |
| Il7      | Interleukin 7                                             |
| Lta      | Lymphotoxin A                                             |
| Ltb      | Lymphotoxin B                                             |
| Mif      | Macrophage migration inhibitory factor                    |
| Nampt    | Nicotinamide phosphoribosyltransferase                    |
| Osm      | Oncostatin M                                              |
| Pf4      | Platelet factor 4                                         |
| Spp1     | Secreted phosphoprotein 1                                 |
| Tbp      | TATA box binding protein                                  |

|           |                                                        |
|-----------|--------------------------------------------------------|
| Tnf       | Tumor necrosis factor                                  |
| Tnfrsf11b | Tumor necrosis factor receptor superfamily, member 11b |
| Tnfsf10   | Tumor necrosis factor (ligand) superfamily, member 10  |
| Tnfsf11   | Tumor necrosis factor (ligand) superfamily, member 11  |
| Tnfsf13   | Tumor necrosis factor (ligand) superfamily, member 13  |
| Tnfsf13b  | Tumor necrosis factor (ligand) superfamily, member 13b |
| Tnfsf4    | Tumor necrosis factor (ligand) superfamily, member 4   |
| Vegfa     | Vascular endothelial growth factor A                   |
